# Supplementary material
Source: Springer Nature journal article supplement (https://www.springermedizin.de/resource/supplementary/12879_2010_1377_MOESM2_ESM.pdf/9443126)

**(A)****Control**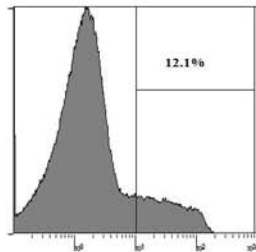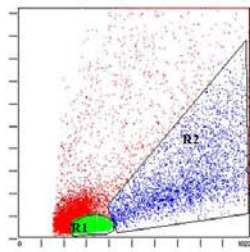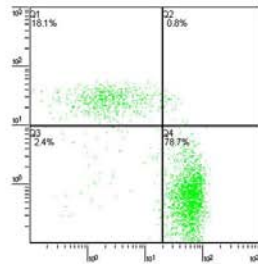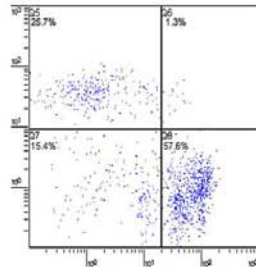**(B)****PHA**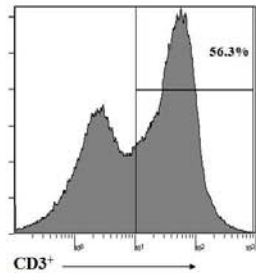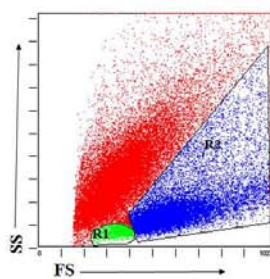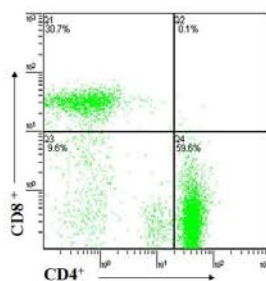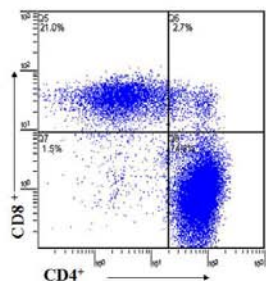

Supplement: MOESM2 [file 9443126]
